# Supplementary material
Source: publisher figshare collection journal article supplement (https://gsajournals.figshare.com/ndownloader/files/27046418)
Supplement: Supplementary file 1 [file 27046418]

| **TABLE S4** | **PRIMERS USED FOR AMPLIFICATION AND SEQUENCING OF KU70 AND NUKU2** |
| --- | --- |
| **PRIMER NAME** | **SEQUENCE** |
| Ai009 | CCT AGT GAG CAG TAG CCA ACA TG |
| Ai013 | GGA TTA TCC AGC TCC TGT AAG ACG |
| Ai014 | AGG ACA AGG CCA GGC AGC |
| Ai015 | GGT AGA CTC TTC CTA GCT CAG G |
| Ai016 | GGA GGG CTA CAC CAT CAC C |
| Ai018 | ACC TGA AGA AAC CTG GGG GC |
| Ai019 | TTT ATT GGA GGA GGC TTG AGA GCC |
| Ai021 | CAC CTG CTC TGG AGT TGC C |
| Ai022a | ACT TCA GGA ACC TGG AGG CC |
| Ai022b | CTC TCT TGT TCT GCA AGG TTT CTG C |
| Ai023 | CTG TGC CAA AGT GAG CAG TAG C |
| Ai024 | CAT GGC AAT GAC AGT GTT AAG GCC |
| Ai025 | GAG AAG GTG GTC ATA GCA TTG TGC |
| Ai026 | CTG GAG TAG TCA CCT GAA TTT TCT GG |
| Ai028 | ACT TCT GTT GGG CAG ACT CTT CC |
| Ai030 | CAA AGT GGG AGG GCT ACA CC |
| Ai037 | GTT TGC TTC TGC CTA GCG ATA CC |
| Ai038 | CTG CCC CTT AAA CTG GTC AAG C |
| Ai053 | TTG CAG AAG GTT CGT GCC AAG G |
| Ai054 | CTC TTT CTC CAG TAT AAT CTG ATG ACT CC |
| Ai055 | TCC TTG TTC ACG TAC CCT GAG G |
| SS004 (Nuku F) | CAA GCC CTT GGT AAT GCT GAA GGA G |
| SS011 (Nuku R1) | CCT TTT GCT TCT GGA ACC TTC ATT ATT GCA |
| SS009 (Nuku R2) | CAC TGC TTG TTC CTC CAT CAA ATA CAA GAT |
| SS030 (Ku70 F1) | GTA CAT CAG TAA GAT CAT AAG CAG TGA TCG |
| SS031 (Ku70 F2) | CGT CTT ACA GGA GCT GGA TAA TCC |
| SS032 (Ku70 R) | CTG GCT TTG GCA CTG TCA TTG C |
